# Supplementary material for: Production of monoclonal antibodies against fullerene C60and development of a fullerene enzyme immunoassay
Source: Royal Society of Chemistry journal article supplement (doi:10.1039/c1an15745k), 2011-11-03
Supplement: c1an15745k.pdf [file c1an15745k.pdf]

## Electronic Supplementary Information

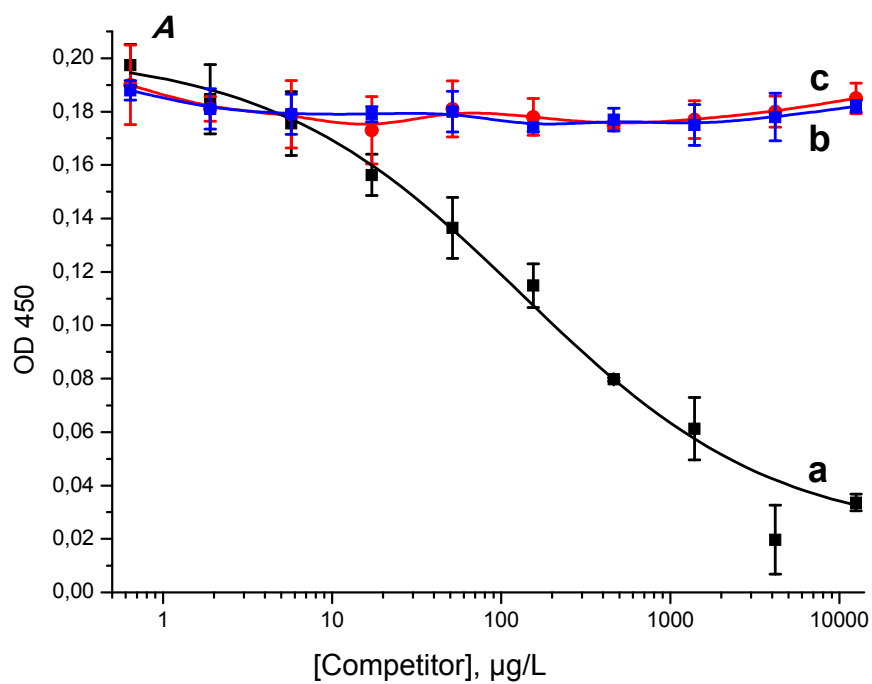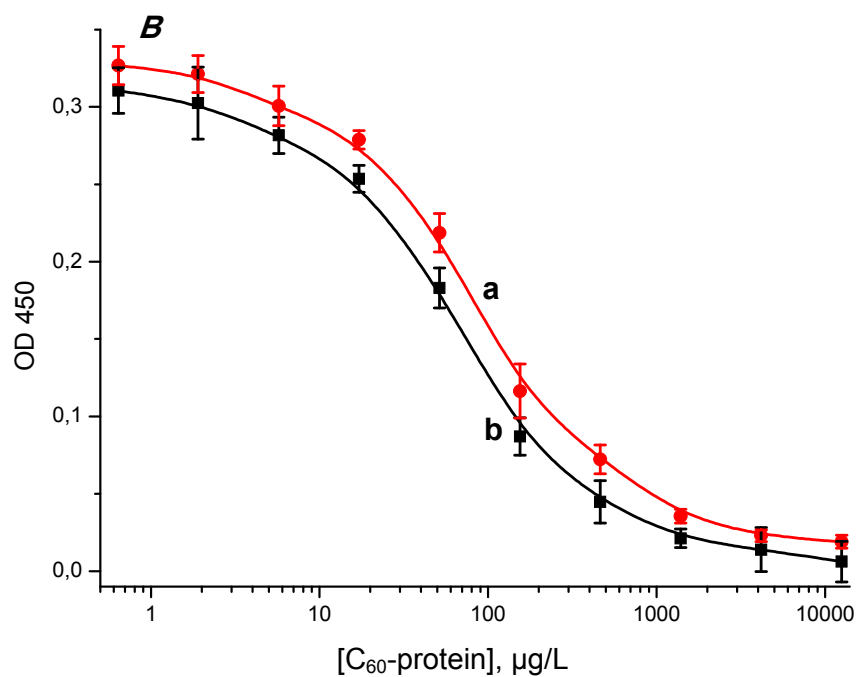

**Fig. S-1** A. Competitive ELISA curves for the C<sub>60</sub>-STI conjugate (a), STI (b) and the 2,4-D-STI conjugate (c) with anti-C<sub>60</sub> clone H1 and immobilized C<sub>60</sub>-PTG.

B. Competition curve for the detection of C<sub>60</sub>-STI (a) and C<sub>60</sub>-BSA (b) conjugates on immobilized C<sub>60</sub>-STI with the clone C12. The detection limits (by coupled C<sub>60</sub>) are equal to 0.5 µg/L for curve (a) and 0.6 µg/L for curve (b).

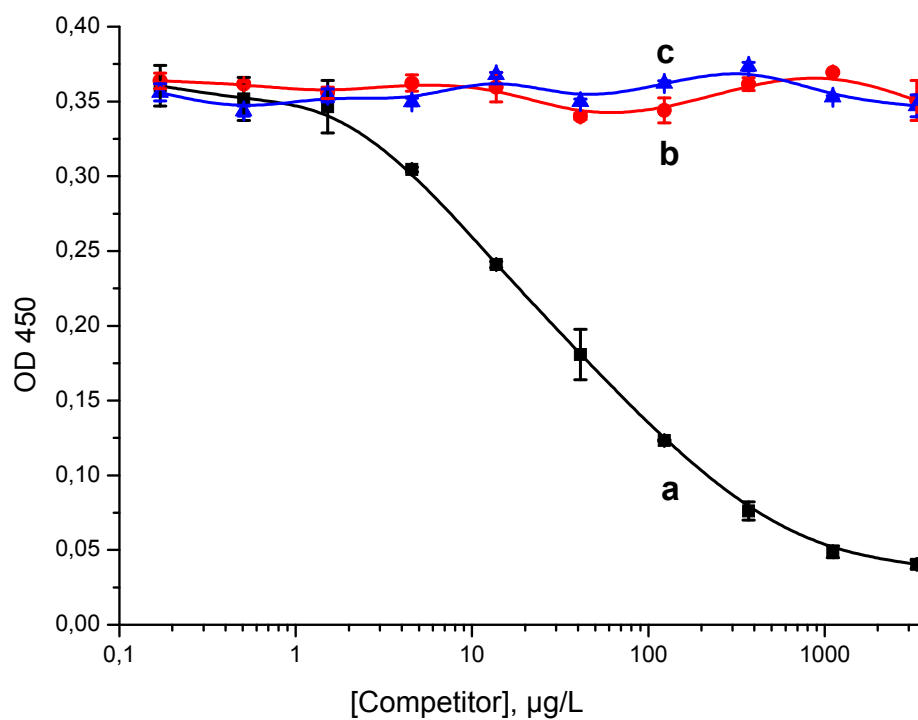

**Fig. S-2** Competitive ELISA curves for the fullerene aminocaproic acid (a), carboxylated atrazine (b) and aminocaproic acid (c) with the clone B1 and immobilized C<sub>60</sub>-STI.

To control the influence of DMF on the antibody activity and, consequently, on the results of ELISA, a 1:1 DMF–PBS solution was added to microplate wells in different quantities instead of an antigen solution in the competitive ELISA. As can be seen from Fig. S3, no significant decrease in the specific binding to the immobilized antigen was observed at DMF concentrations up to 12.5%.

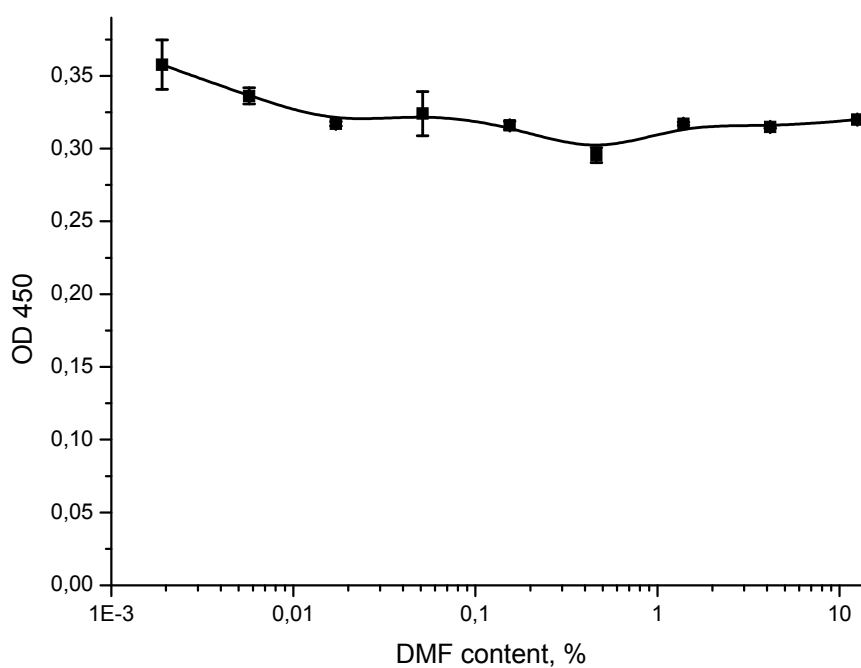

**Fig. S-3** Influence of different DMF contents in the reaction medium on the binding of antibodies to the immobilized C<sub>60</sub>-protein conjugate (without a competitor).

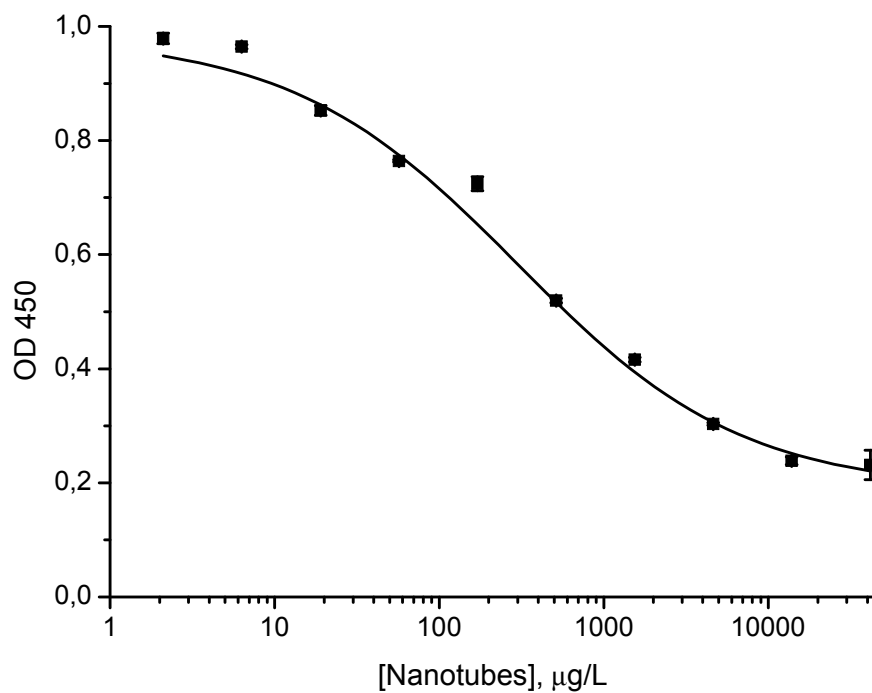

**Fig. S-4** Competitive ELISA curve for multi-walled carbon nanotubes with the clone B1 and immobilized C<sub>60</sub>-STI.

**Table S-1** Detection limits ( $IC_{10}$ ) for the ELISA of C<sub>60</sub>-protein conjugates

| Immobilized antigen  | Clone of antibodies | Antigen in solution  | Detection limit (by protein), $\mu\text{g/L}$ | Detection limit (by C <sub>60</sub> ), $\mu\text{g/L}$ |
|----------------------|---------------------|----------------------|-----------------------------------------------|--------------------------------------------------------|
| C <sub>60</sub> -PTG | B1                  | C <sub>60</sub> -STI | 14.8                                          | 1.1                                                    |
| C <sub>60</sub> -PTG | B11                 | C <sub>60</sub> -BSA | 18.8                                          | 1.8                                                    |
| C <sub>60</sub> -PTG | C12                 | C <sub>60</sub> -BSA | 12.0                                          | 1.2                                                    |
| C <sub>60</sub> -PTG | C12                 | C <sub>60</sub> -STI | 13.6                                          | 1.0                                                    |
| C <sub>60</sub> -PTG | F11                 | C <sub>60</sub> -STI | 13.7                                          | 1.0                                                    |
| C <sub>60</sub> -PTG | G4                  | C <sub>60</sub> -BSA | 3.4                                           | 0.3                                                    |
| C <sub>60</sub> -PTG | H1                  | C <sub>60</sub> -STI | 3.0                                           | 0.2                                                    |
| C <sub>60</sub> -PTG | H1                  | C <sub>60</sub> -BSA | 3.8                                           | 0.4                                                    |
| C <sub>60</sub> -STI | C12                 | C <sub>60</sub> -BSA | 6.4                                           | 0.6                                                    |
| C <sub>60</sub> -STI | C12                 | C <sub>60</sub> -STI | 7.6                                           | 0.5                                                    |
| C <sub>60</sub> -STI | F11                 | C <sub>60</sub> -BSA | 5.1                                           | 0.5                                                    |
| C <sub>60</sub> -STI | H1                  | C <sub>60</sub> -BSA | 4.4                                           | 0.4                                                    |
| C <sub>60</sub> -BSA | C12                 | C <sub>60</sub> -STI | 7.3                                           | 0.5                                                    |
| C <sub>60</sub> -BSA | C12                 | C <sub>60</sub> -BSA | 4.4                                           | 0.4                                                    |

**Table S-2** Detection limits ( $IC_{10}$ ) for the ELISA of fullerene aminocaproic acid

| Immobilized antigen  | Clone of antibodies | Detection limit, $\mu\text{g/L}$ |
|----------------------|---------------------|----------------------------------|
| C <sub>60</sub> -STI | B1                  | 0.8                              |
| C <sub>60</sub> -STI | B2                  | 2.1                              |
| C <sub>60</sub> -STI | C12                 | 3.1                              |
| C <sub>60</sub> -STI | D3                  | 7.1                              |
| C <sub>60</sub> -BSA | G4                  | 2.8                              |
| C <sub>60</sub> -BSA | B1                  | 2.7                              |
| C <sub>60</sub> -BSA | C12                 | 3.2                              |
| C <sub>60</sub> -PTG | G4                  | 1.9                              |
| C <sub>60</sub> -PTG | F11                 | 8.2                              |

**Table S-3** Detection limits ( $IC_{10}$ ) for the ELISA of fulleranol

| Immobilized antigen  | Clone of antibodies | Detection limit, $\mu\text{g/L}$ |
|----------------------|---------------------|----------------------------------|
| C <sub>60</sub> -STI | H1                  | 1.1                              |
| C <sub>60</sub> -STI | B1                  | 5.6                              |
| C <sub>60</sub> -STI | C12                 | 0.9                              |
| C <sub>60</sub> -PTG | C12                 | 2.5                              |
| C <sub>60</sub> -PTG | F11                 | 1.9                              |
| C <sub>60</sub> -PTG | B1                  | 3.2                              |



**Table S-4** Detection limits ( $IC_{10}$ ) for the ELISA of free fullerene  $C_{60}$

| Immobilized antigen | Clone of antibodies | Detection limit, $\mu\text{g/L}$ |
|---------------------|---------------------|----------------------------------|
| $C_{60}$ -STI       | H1                  | 2.0                              |
| $C_{60}$ -STI       | B1                  | 28                               |
| $C_{60}$ -STI       | C12                 | 40                               |
| $C_{60}$ -PTG       | B11                 | 51                               |
| $C_{60}$ -PTG       | F11                 | 300                              |
| $C_{60}$ -STI       | D3                  | >1000                            |
| $C_{60}$ -STI       | G4                  | >1000                            |
| $C_{60}$ -STI       | B2                  | >1000                            |
